# Supplementary material
Source: PubMed Central journal article supplement (PMC4414806)
Supplement: NIHMS665337-supplement.pdf [file NIHMS665337-supplement.pdf]

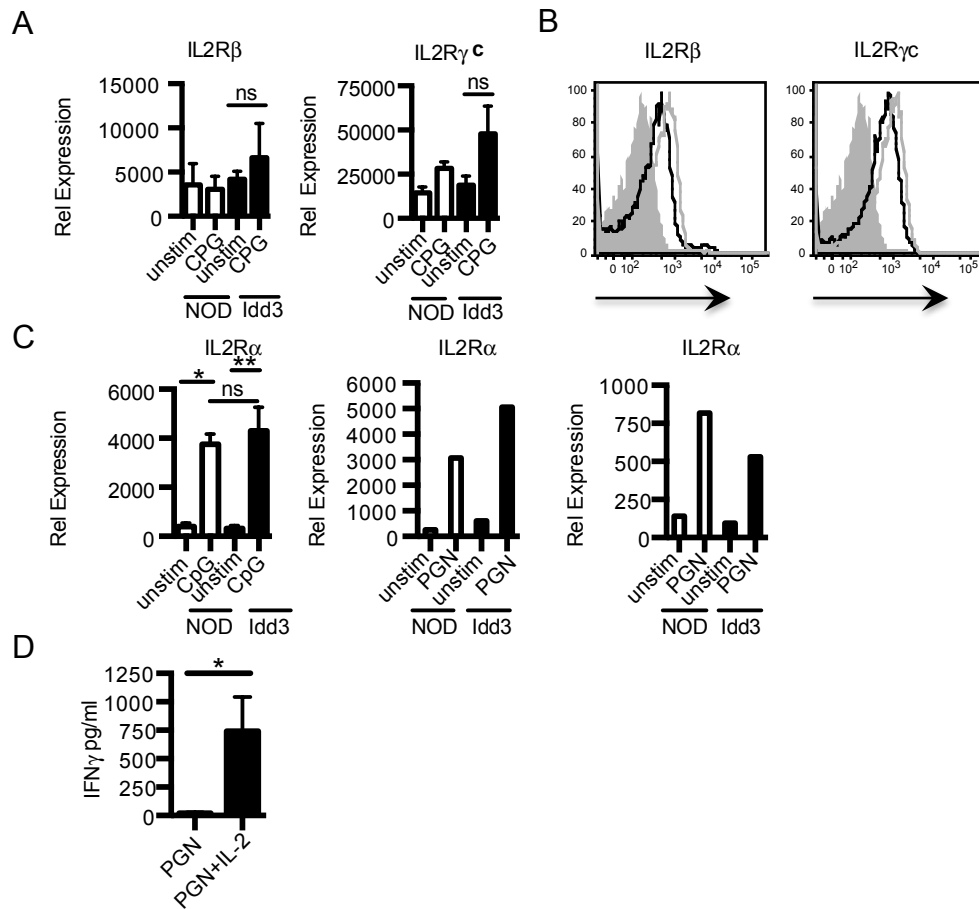

**Supplemental Figure 1. Expression of IL-2 receptor chains and IL-2 promotion of IFN- $\gamma$  production in CD11b<sup>+</sup> CD11c<sup>-</sup> cells.**

A) CD11b<sup>+</sup>CD11c<sup>-</sup> cells were isolated from the spleens of NOD and NOD.*Idd3* mice by cell sorting and stimulated with CpG for 4 h as indicated. Cells were then lysed for RNA isolation and use in real-time PCR. IL2R $\beta$  (n= 3), IL2R $\gamma$ c (n=3). ns=not significant. B) Expression of IL2R $\beta$  and IL2R $\gamma$ c on NOD CD11b<sup>+</sup>CD11c<sup>-</sup> cells before (black line) and after stimulation with CpG (gray line). Filled histogram, fluorescence minus one control. C) CD11b<sup>+</sup>CD11c<sup>-</sup> cells were prepared as in (A) and stimulated with either CpG or PGN. Left panel, CD25 (IL2R $\alpha$ ) (n=4), \*p=0.0003, \*\*p=0.006, t-test. ns=not significant. Middle and right panels, data from two independent experiments. C) CD11b<sup>+</sup>CD11c<sup>-</sup> cells were isolated from the spleens of NOD mice

and stimulated with PGN in the presence or absence of 25ng/mL IL-2 for 24h, (n=5). \*p=0.0447, t-test. Cytokine measured by CBA.

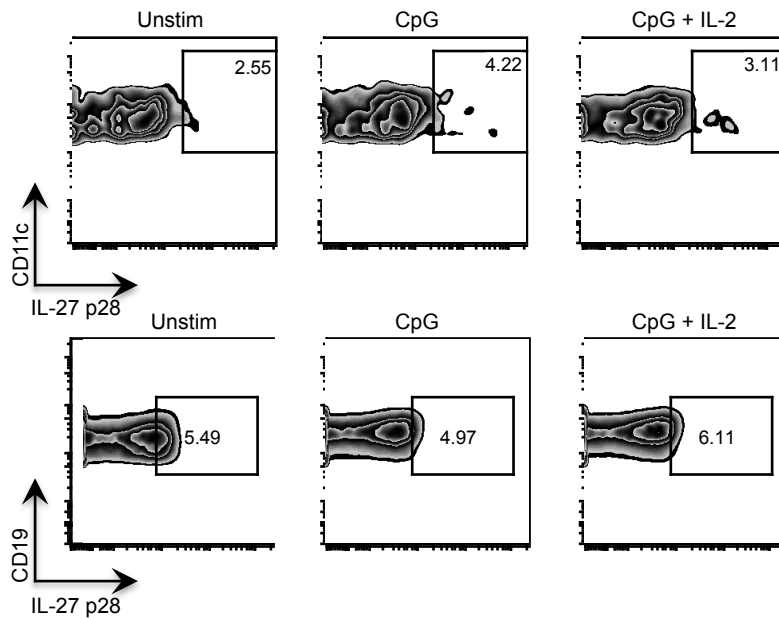

**Supplemental Figure 2. IL-27 p28 is mainly produced by CD11b<sup>+</sup> CD11c<sup>-</sup> cells.**

NOD APC were T-depleted and stimulated for 18h with media, CpG, or CpG+IL-2. Cells were washed, incubated with GolgiStop for 4h and intracellular cytokine staining preformed. Data are representative of five experiments.
